# Supplementary material for: Mutual Destruction of Deep Lung Tumor Tissues by Nanodrug‐Conjugated Stealth Mesenchymal Stem Cells
Source: PubMed Central journal article supplement (PMC5979625; doi:10.1002/advs.201700860), 2018-02-26
Supplement: ADVS-5-1700860-s002.pdf [file ADVS-5-1700860-s002.pdf]

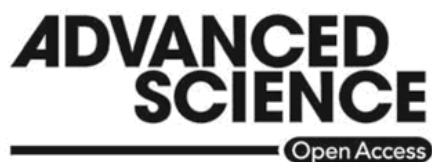

## Supporting Information

for *Adv. Sci.*, DOI: 10.1002/advs.201700860

Mutual Destruction of Deep Lung Tumor Tissues by  
Nanodrug-Conjugated Stealth Mesenchymal Stem Cells

*Sang-Woo Kim, Yeon Kyung Lee, Jeong Hee Hong, Jun-Young  
Park, Young-Ae Choi, Dong Un Lee, Jungil Choi, Sun Jin  
Sym, Sang-Hyun Kim,\* and Dongwoo Khang\**

Supplementary information for

Mutual Destruction of Malignant Lung Cancer by

Nanodrug-Conjugated Stealth Mesenchymal Stem Cells

Sang-Woo Kim<sup>1,\*</sup>, Yeon Kyung Lee<sup>1,\*</sup>, Jeong Hee Hong<sup>1,2,\*</sup>, Jun-Young Park<sup>1,\*</sup>, Young-Ae Choi<sup>4</sup>, Dong Un Lee<sup>1</sup>, Jungil Choi<sup>3</sup>, Sun Jin Sym<sup>4</sup>, Sang-Hyun Kim<sup>5,†</sup>, and Dongwoo Khang<sup>1,2,†</sup>

<sup>1</sup>*Lee Gil Ya Cancer and Diabetes Institute, Gachon University, Incheon 21999, South Korea*

<sup>2</sup>*Department of Physiology, School of Medicine, Gachon University, Incheon 21999, South Korea*

<sup>3</sup>*Gyeongnam Department of Environmental Toxicology and Chemistry, Korea Institute of Toxicology, Jinju 52834, South Korea*

<sup>4</sup>*Division of Hematology and Oncology, School of Medicine, Gachon University & Gil Hospital, Incheon 21565, South Korea*

<sup>5</sup>*Department of Pharmacology, School of Medicine, Kyungpook National University, Daegu 41566, South Korea*

†emails: [dkhang@gachon.ac.kr](mailto:dkhang@gachon.ac.kr) or [shkim72@knu.ac.kr](mailto:shkim72@knu.ac.kr)

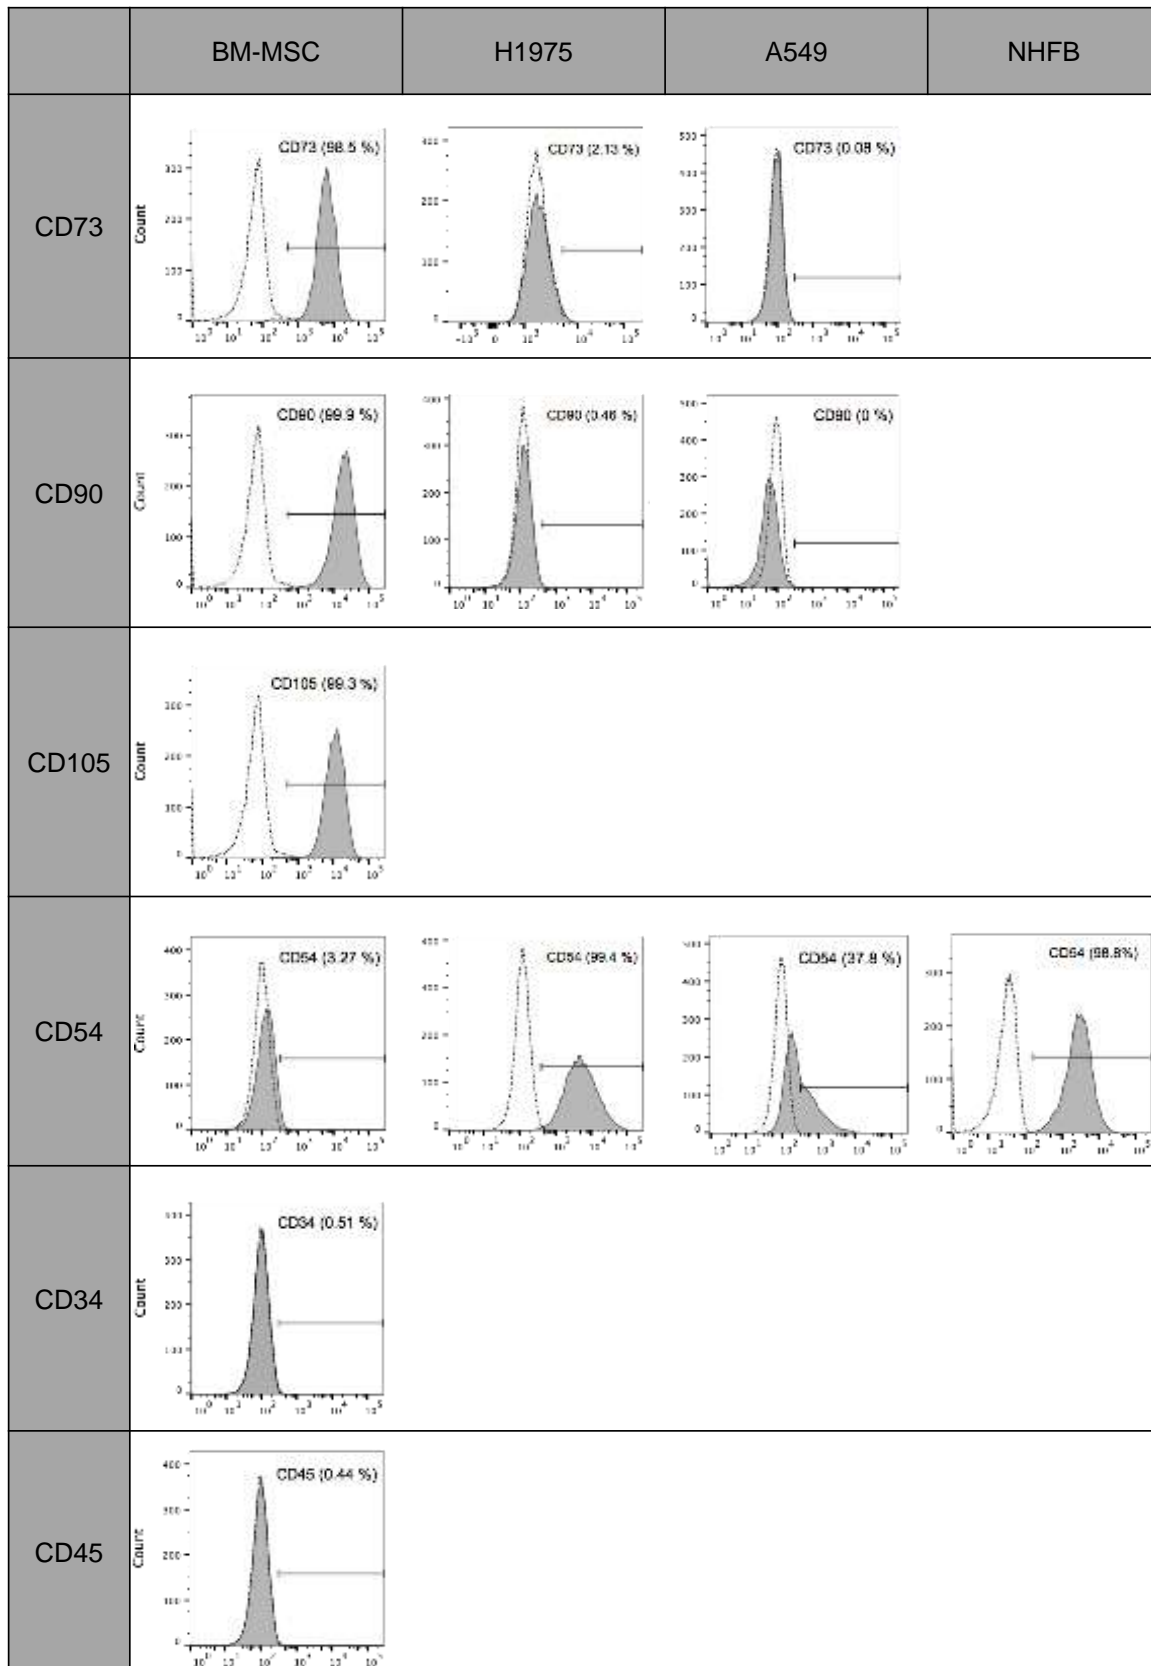

**Supplementary Fig. 1.** FACS analysis for identifying CD markers in BM-MSC, H1975, A549, and NHFB cells.

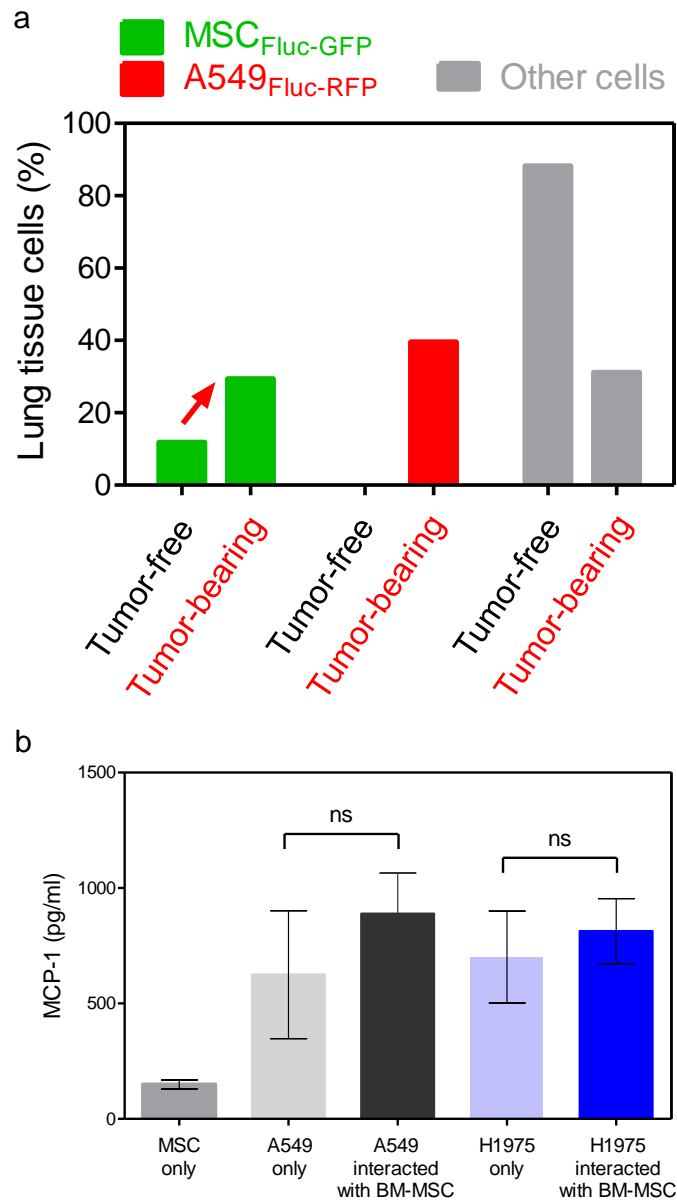

**Supplementary Fig. 2. (a)** Percentage of MSC<sub>Fluc-GFP</sub> that migrated to tumor-free and lung tumor-bearing (A549<sub>Fluc-RFP</sub>) mice 2 days after the intravenous injection of MSC<sub>Fluc-GFP</sub>. FACS analysis was performed to quantify the percentage of the lung tissue cells shown (from a total cell population of  $10^4$  cells). **(b)** MCP-1 chemokine from A549 and H1975 cells when co-cultured with BM-MSC. MCP-1 from lung cancer cells (i.e., A549 or H1975) did not increase when co-cultured with MSC. Data represent mean  $\pm$  SEM (n=3) and the p-value reference was based on lung cancer (e.g., A549 and H1975) cells only (at 48 hrs).

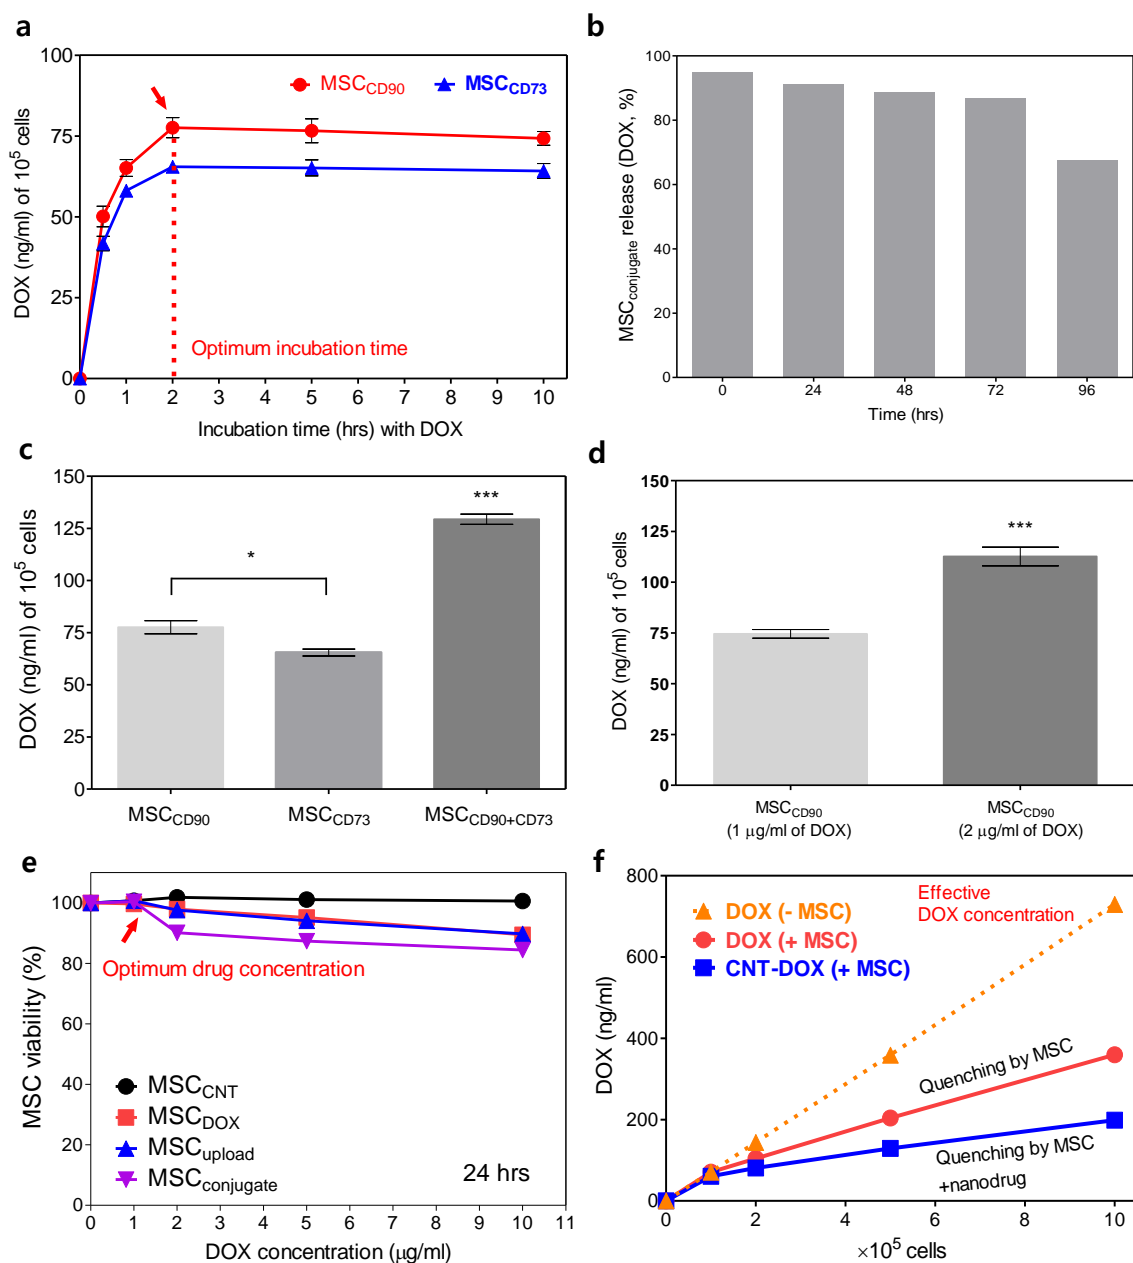

**Supplementary Fig. 3. Optimization and stability of MSC-nanodrug conjugation.**

**(a)** Conjugated DOX concentration on MSC ( $10^5$  cells) after various incubation time (i.e., 0-10 hrs) (at a dosage of 1  $\mu$ g/ml of nanodrug treatment). **(b)** percentage of DOX release from MSC<sub>conjugate</sub> at up to 96 hrs (FACS). **(c)** DOX amount of MSC<sub>CD90</sub>, MSC<sub>CD73</sub>, and MSC<sub>CD90+CD73</sub> (at a dosing of 1  $\mu$ g/ml of nanodrug treatment). **(d)** Amount of DOX conjugated to MSC<sub>CD90</sub> after interaction with different drug concentrations (i.e., 1 or 2  $\mu$ g/ml of nanodrug). **(e)** MTT assay confirmed that 1  $\mu$ g/ml

of DOX is non-toxic for both MSC<sub>upload</sub> and MSC<sub>conjugate</sub> after 24 hrs of incubation. Data represents mean  $\pm$  SEM ( $n=5$ ). **(f)** Graph represents the non-linear fluorescence standard curve of DOX. DOX fluorescence intensity (when mixed with MSC) was quenched by MSC and MSC-conjugated nanodrug. The excitation and emission wavelengths for DOX were 490 nm and 580 nm, respectively.

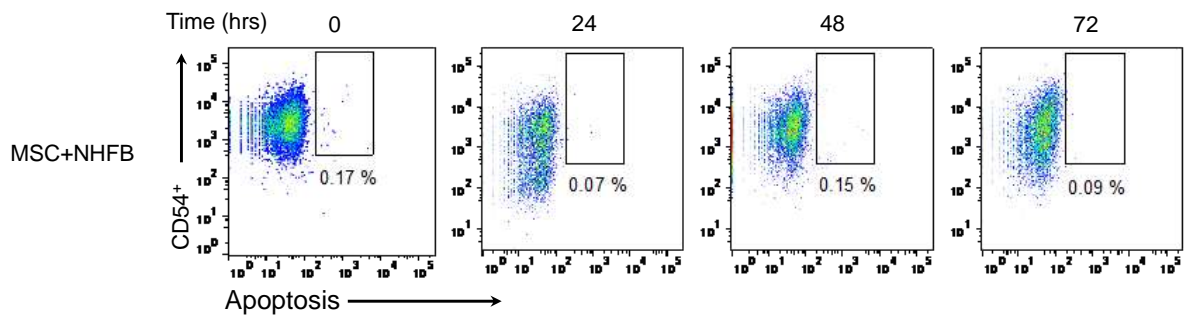

**Supplementary Fig. 4.** Time-dependent apoptosis of NHFB (normal cells) when co-cultured with MSC. Apoptosis of NHFB was found to be non-significant after 0, 24, 48 and 72 hrs (determined by BV421-labeled Annexin V,  $1 \times 10^4$  single cell events were acquired).

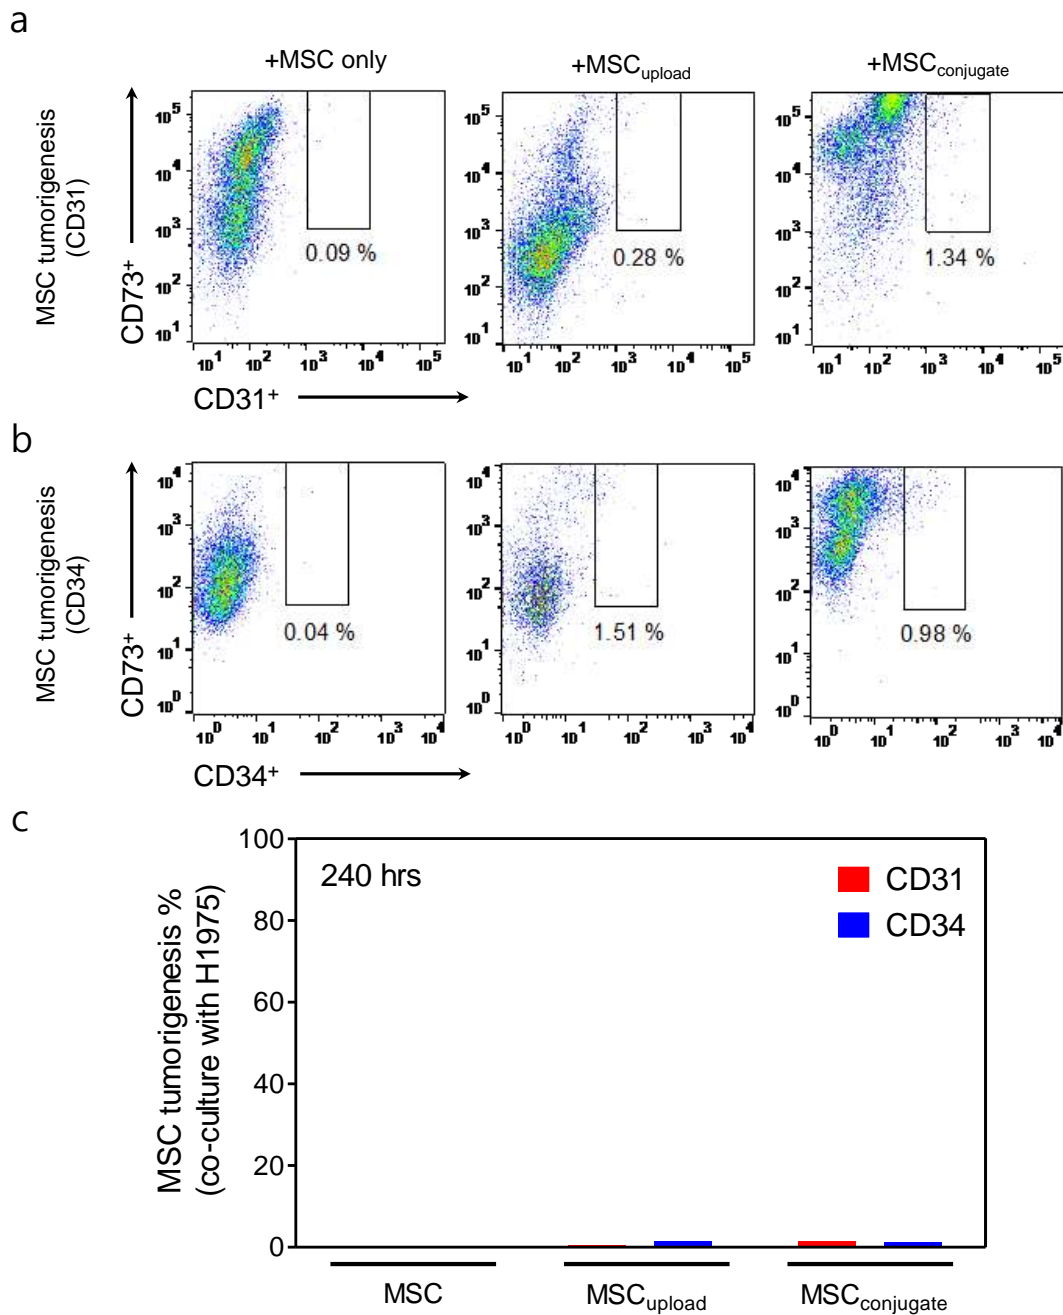

**Supplementary Fig. 5.** Long-term tumorigenesis of MSC, MSC<sub>upload</sub> and MSC<sub>conjugate</sub> when co-cultured with H1975 lung cancer cells. After 240 hrs, tumorigenesis of MSC cells was identified by both BV421-labeled **(a)** CD31 and **(b)** CD34. ( $1 \times 10^4$  single cell events were acquired). **(c)** MSC tumorigenesis after 240 hrs of co-culture with H1975 cells confirmed negligible tumorigenesis markers (CD31 and CD34).



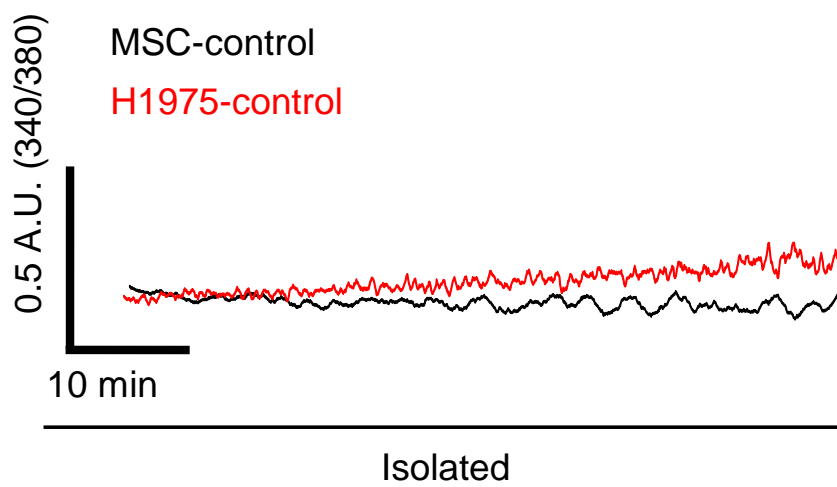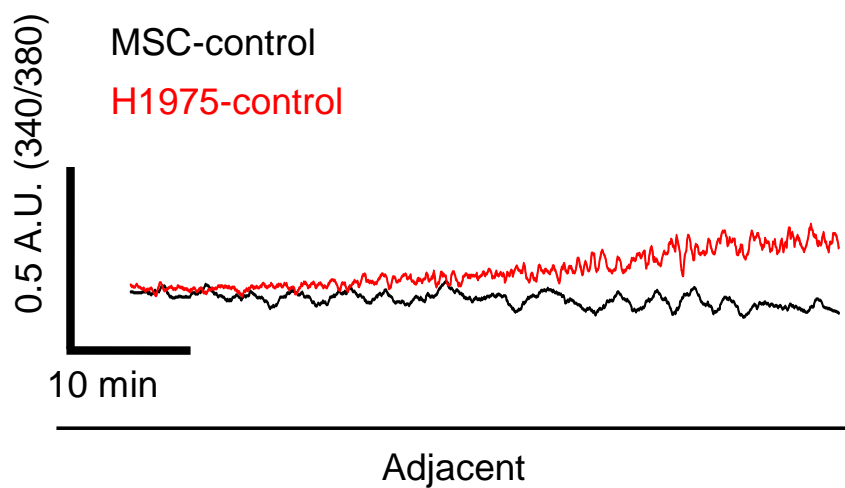

**Supplementary Fig. 6.** Changes in  $[Ca^{2+}]_i$  for isolated and adjacent MSC-control (black) and H1975-control (red) cells.

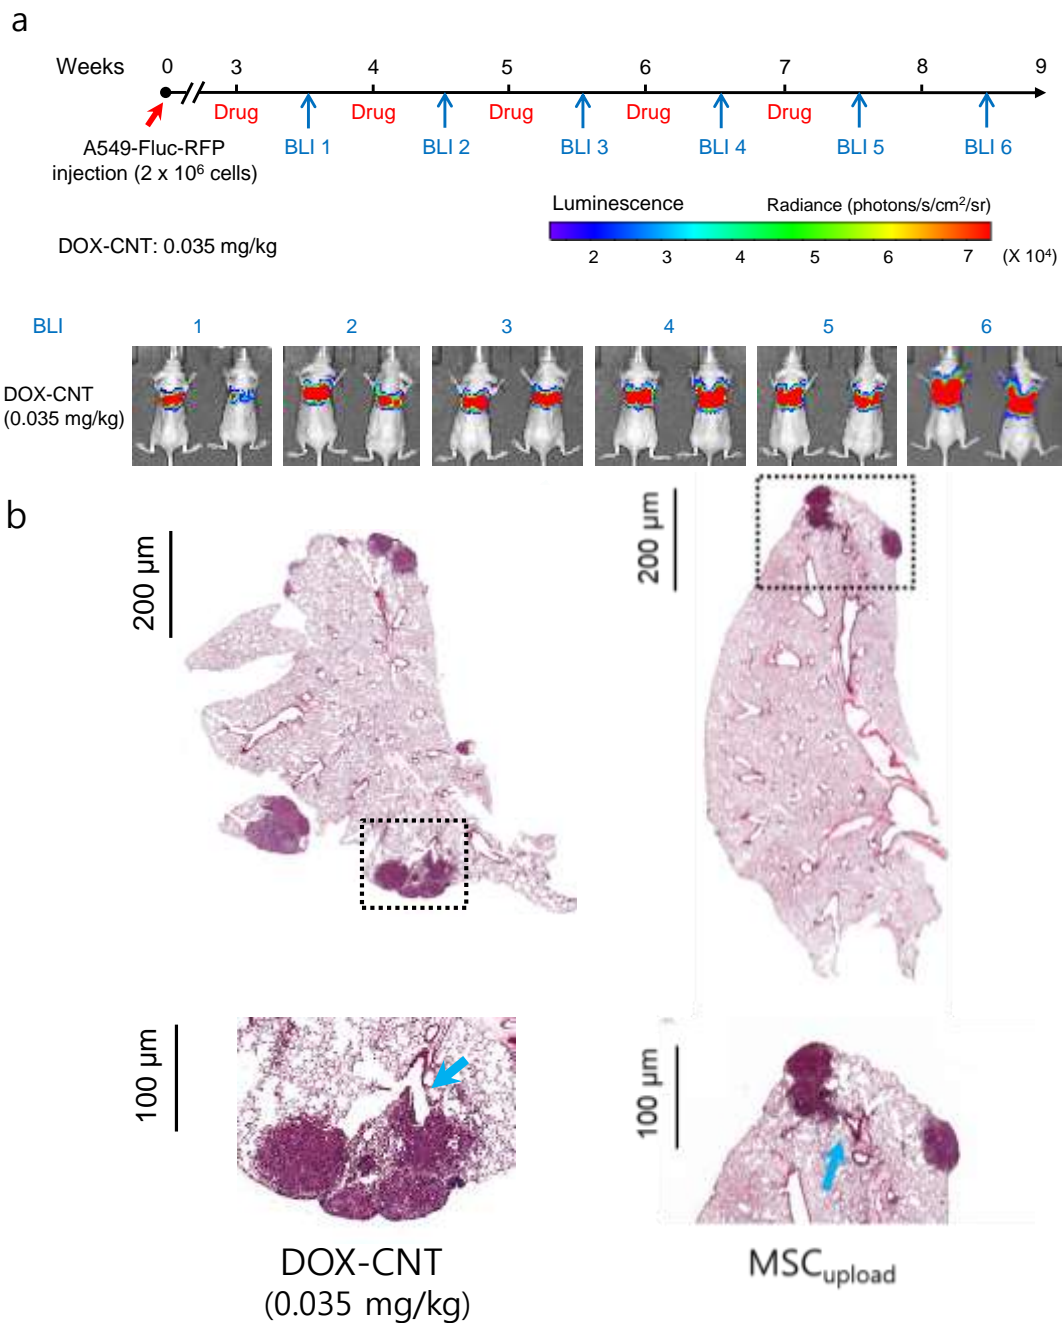

**Supplementary Fig. 7. (a)** BLI of luciferase expression of A549 lung tumor-bearing mice after treatment with DOX-CNT (0.035 mg/kg). **(b)** H&E staining (at 100x magnification) of lung tissue from A549 tumor-bearing mice after treatment with DOX-CNT (0.035 mg/kg) and MSC<sub>upload</sub>. The dashed-box image shows the presence of tumor tissues; magnified view shows evidence of blood vessels connected to the tumor sites (indicated by a blue arrow).

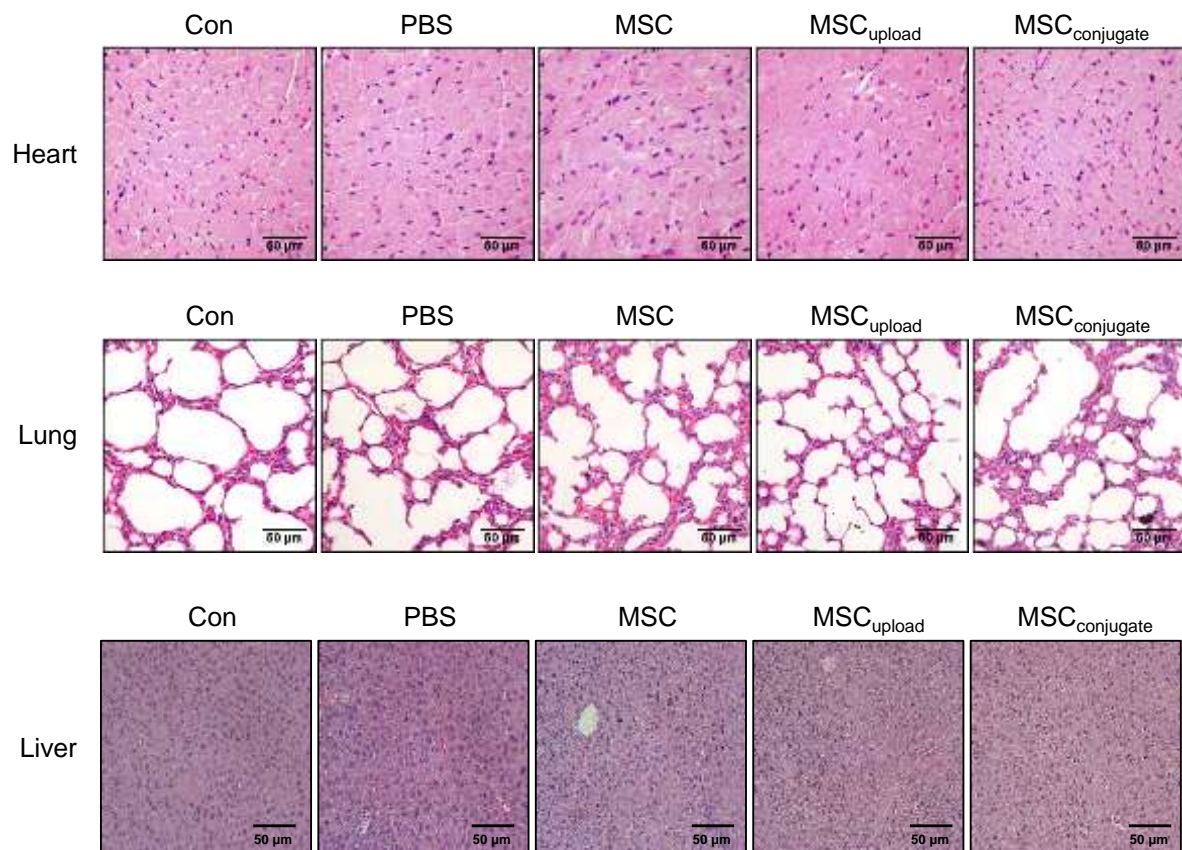

**Supplementary Fig. 8.** H&E-stained images of heart, lung, and liver tissues collected from mice with various injected treatments (i.e., control (con), PBS, MSC, MSC<sub>upload</sub>, and MSC<sub>conjugate</sub>) after 9 weeks (at 100x magnification).

ICR mouse (Single exposure: n=10, Repeated exposure : n=10) |

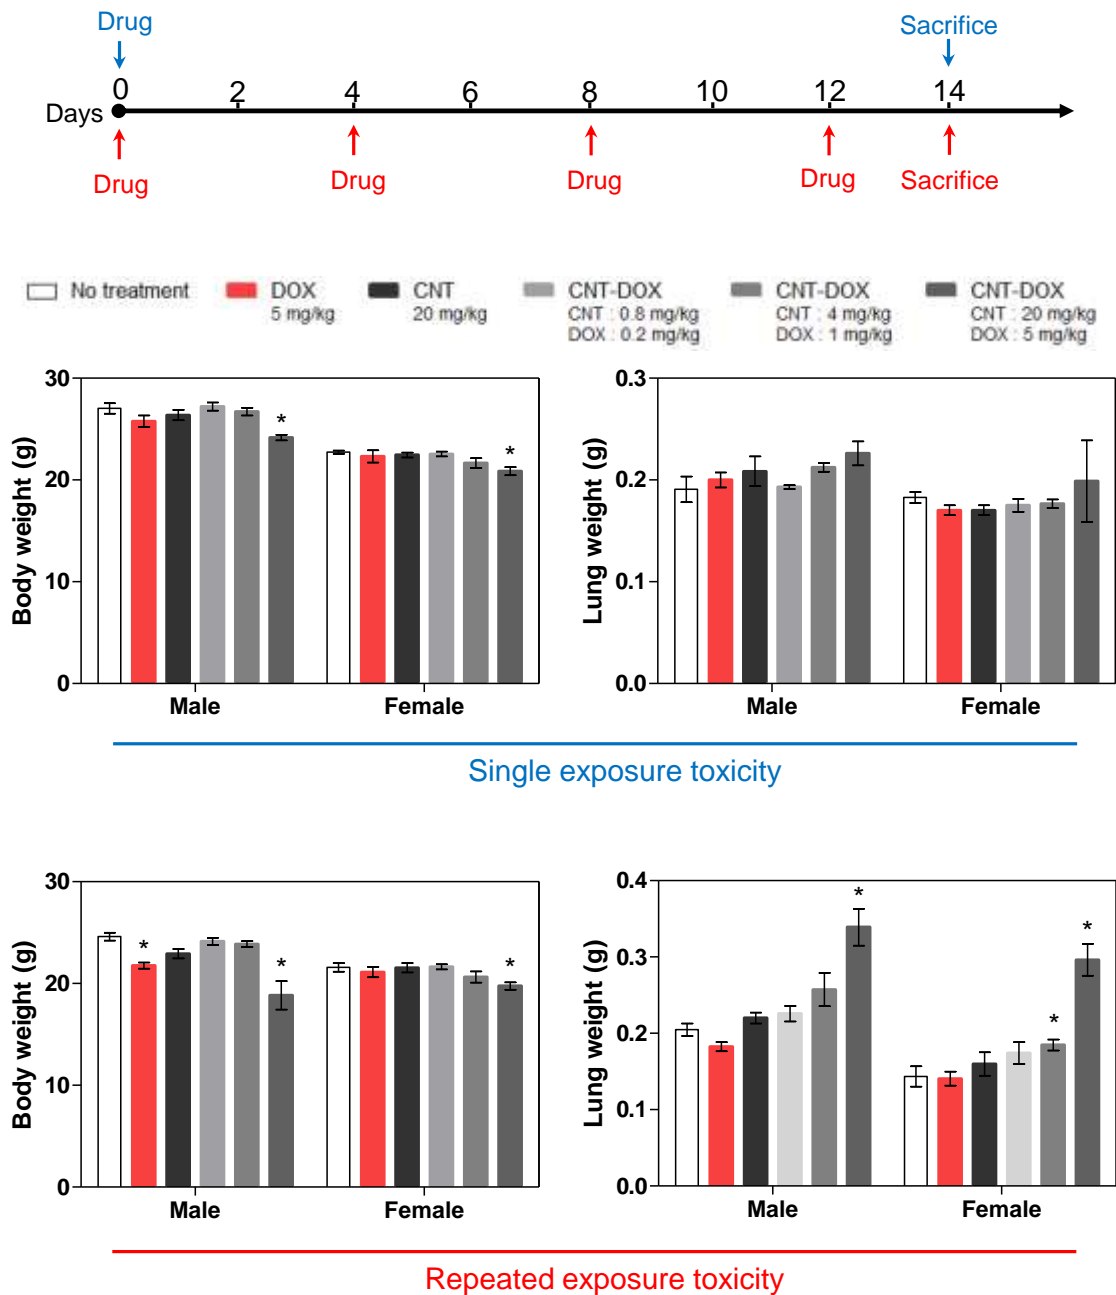

**Supplementary Fig. 9.** Single and repeated exposure toxicity evaluations shows significant lung weight changes in 5 mg/kg of CNT-DOX conjugation (20 mg/kg of CNTs with 5 mg/kg DOX conjugation). No pulmonary toxicity (weight change) was induced by nanodrug with dose of 0.2 mg/kg and 1 mg/kg of CNT-DOX (based on DOX dose).

**Supplementary Movie 1:** Live cell recording obtained by confocal quantitative image cytometer showing the mutual apoptosis of H1975 (green) cells and MSC<sub>conjugate</sub> (red) within 3~10 hrs of co-culturing.

**Supplementary Movie 2:** Live cell recording obtained by confocal quantitative image cytometer showing the mutual apoptosis of H1975 (green) cells near MSC<sub>conjugate</sub> (red) within 3~10 hrs of co-culturing.

**Supplementary Movie 3:** Live cell recording obtained by confocal quantitative image cytometer showing the no apoptosis of H1975 (green) cells near MSC (not seen) for 36 hrs of co-culturing.
